# Supplementary material for: Response of a Wild Edible Plant to Human Disturbance: Harvesting Can Enhance the Subsequent Yield of Bamboo Shoots
Source: PLOS journal article supplement (doi:10.1371/journal.pone.0146228), 2015-12-31
Supplement: S1 (10.1371/journal.pone.0146228.s001) [file journal.pone.0146228.s001]

(a)

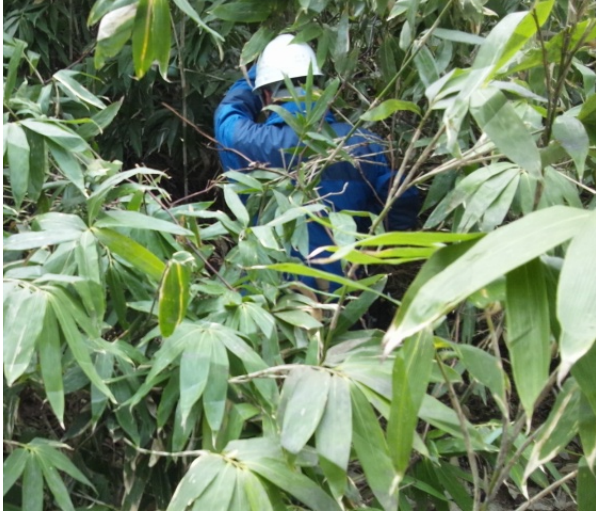

(b)

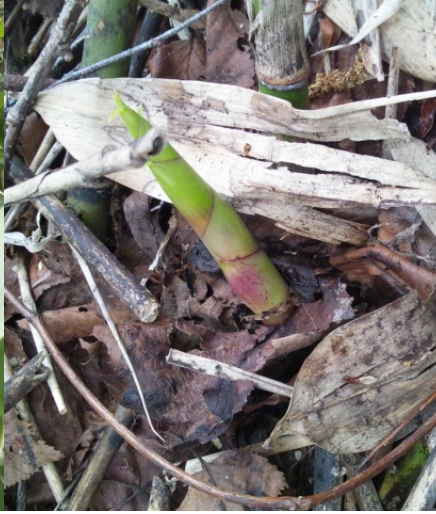

(c)

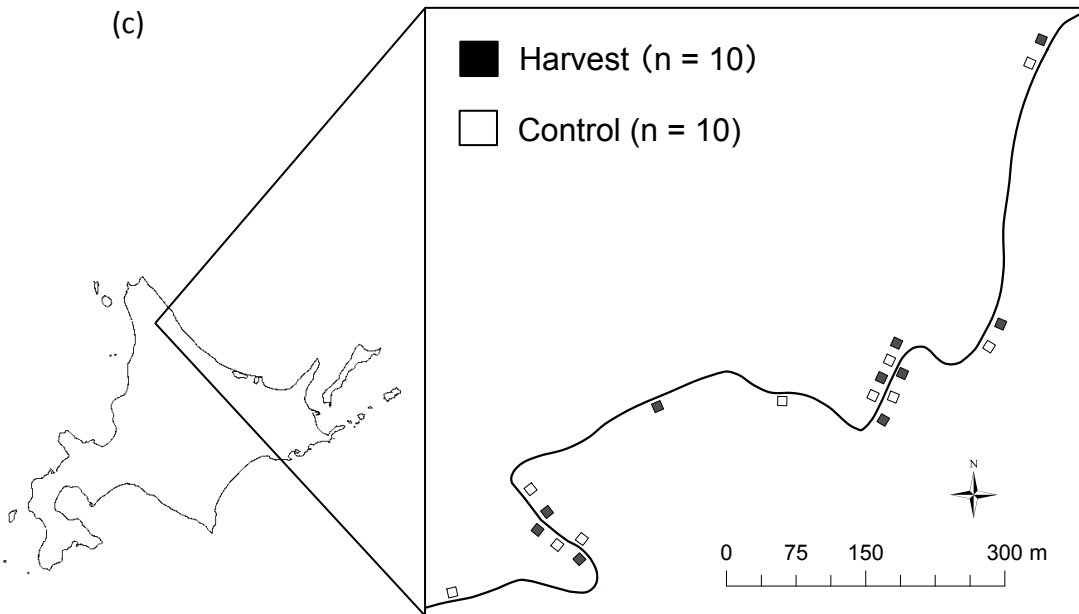

**S1 Appendix. Photographs of bamboo and map of study site.** (a) Matured bamboo grass (*Sasa kurilensis*) and (b) its young edible shoot. The height of a person in (a) is about 170 cm. (c) Location of study site in the Teshio experimental forest. Solid curve in (c) denotes a forest road. Solid and open squares indicate “harvest” and “control” research plots (10 × 10 m), respectively.
